# Supplementary material for: miR-491-5p inhibits the proliferation and migration of A549 cells by FOXP4
Source: PubMed Central journal article supplement — Exp Ther Med. 2021 Apr 14;21(6):622. doi: 10.3892/etm.2021.10054 (PMC8082662; doi:10.3892/etm.2021.10054), 2021-04-14

Figure S1. The miR-491-5p expression levels of A549 cells transfected with miR-491-5p inhibitors and NC inhibitors. \*\*\*P<0.001. miR, microRNA; NC, negative control.

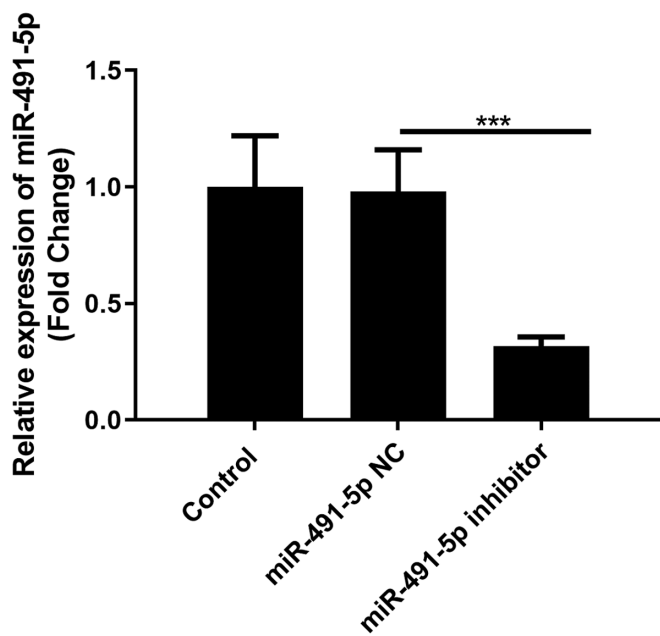

Supplement: Supplementary_Data.pdf [file Supplementary_Data.pdf]
